# Supplementary material for: Enhancement of cell membrane permeability by using charged nanoparticles and a weak external electric field
Source: Royal Society of Chemistry journal article supplement (doi:10.1039/d3cp03281g), 2023-01-01
Supplement: d3cp03281g1.pdf [file d3cp03281g1.pdf]

Supplementary Information for

**Enhancement of cell membrane permeability by using charged nanoparticles and a weak external electric field**

Hideya Nakamura\*<sup>a</sup>, Takumi Okamura<sup>a</sup>, Masaya Tajima<sup>a</sup>, Ryuji Kawano<sup>b</sup>, Misa Yamaji<sup>b</sup>,

Shuji Ohsaki<sup>a</sup> and Satoru Watano<sup>a</sup>

<sup>a</sup> Department of Chemical Engineering, Osaka Metropolitan University,

1-1 Gakuen-cho, Naka-ku, Sakai, Osaka 599-8531, Japan

<sup>b</sup> Department of Biotechnology and Life Science, Tokyo University of Agriculture and

Technology, 2-24-16 Naka-cho, Koganei, Tokyo 184-8588, Japan.

\*Address correspondence to [hideyanakamura@omu.ac.jp](mailto:hideyanakamura@omu.ac.jp) (H. Nakamura)

## A. Supplementary Tables

**Table S1** NP concentration per unit area of membrane and surface coverage of NP on the membrane surface. The concentration and surface coverage were estimated if all the NPs adhered to the inner surface of the aqueous droplet in the well. The surface coverage was estimated by assuming that the inner surface of the aqueous droplet was covered with NPs in a close-packed single layer.

| NP concentration<br>[particles/ $\mu\text{L}$ ] | NP concentration<br>[mg-NP/ $\mu\text{m}^2$ -aqueous droplet] | Surface coverage<br>of NPs [%] |
|-------------------------------------------------|---------------------------------------------------------------|--------------------------------|
| $1.0 \times 10^9$                               | $3.8 \times 10^{-11}$                                         | 502                            |
| $1.0 \times 10^8$                               | $3.8 \times 10^{-12}$                                         | 50.2                           |
| $1.0 \times 10^6$                               | $3.8 \times 10^{-14}$                                         | 0.502                          |

**Table S2** (a) NP concentrations used in this study and (b) safe doses reported in cytotoxicity tests. Safe dose data were extracted from literatures using the same amine-PSL-NPs (Sigma Aldrich, L0780) as in this study. The NP concentration and safe dose were standardized by mass of NPs per unit surface area of aqueous droplet or cell.

| <b>a</b>                                                      |                                                |  |  |
|---------------------------------------------------------------|------------------------------------------------|--|--|
| NP concentration<br>[mg-NP/ $\mu\text{m}^2$ -aqueous droplet] |                                                |  |  |
| Present study                                                 | $3.8 \times 10^{-14}$ to $3.8 \times 10^{-11}$ |  |  |

  

| <b>b</b>  |                                             |                        |                                                                                                                                            |
|-----------|---------------------------------------------|------------------------|--------------------------------------------------------------------------------------------------------------------------------------------|
| Reference | Safe dose<br>[mg-NP/ $\mu\text{m}^2$ -cell] | Cell type              | Note                                                                                                                                       |
| 1         | $6.3 \times 10^{-11}$                       | Hela cell              | ·Cell concentration was estimated to be $5 \times 10^4$ cells/mL<br>·Cell surface area was assumed to be $1600 \mu\text{m}^2$ <sup>4</sup> |
| 1         | $9.0 \times 10^{-11}$                       | 3T3<br>fibroblast cell | ·Cell concentration was estimated to be $5 \times 10^4$ cells/mL<br>·Cell surface area was assumed to be $1110 \mu\text{m}^2$ <sup>5</sup> |
| 2, 3      | $1.2 \times 10^{-9}$                        | Yeast                  | ·Cell surface area was assumed to be $134 \mu\text{m}^2$ <sup>6</sup>                                                                      |

## B. Supplementary References

1. Y. Liu, W. Li, F. Lao, Y. Liu, L. Wang, R. Bai, Y. Zhao, C. Chen, *Biomaterials*, 2011, **32**, 8291-8303.
2. J. Miyazaki, Y. Kuriyama, A. Miyamoto, H. Tokumoto, Y. Konishi, T. Nomura, *Adv. Powder Technol.*, 2014, **25**, 1394-1397.
3. J. Miyazaki, Y. Kuriyama, H. Tokumoto, Y. Konishi, T. Nomura, *Colloid Surface A*, 2015, **469**, 287-293.
4. T. T. Puck, P. I. Marcus, S. J. Cieciora, *J. Exp. Med.*, 1956, **103**, 273–284.
5. J. P. Seher, G. Adam, *Zeitschrift für Naturforschung C*, 1978, **33**, 739-743.
6. C. D. Powell, D. E. Quain, K. A. Smart, *Microbiology*, 2003, **149**, 3129-3137.
